# Supplementary material for: Novel Cellulose Nanofibers/Polyvinyl Alcohol/Polyethyleneimine Nanoparticle for Cu2+ Removal in Water
Source: Research Square preprint supplement (doi:10.21203/rs.3.rs-485817/v1), 2021-05-13
Supplement: Supplementary file 1 [file 8009893a2710e5f9bba67c37.docx]

Support Information

Adsorption of Cu2+ on different samples

0.1g of BSP, CNF aerogel, CNF/PVA aerogel and CNF/PVA/PEI nanoparticles were adsorbed in Cu2+ solution with concentration of 20mg/L, pH of 6 and temperature of 25°C in a constant temperature water bath generator for 2h to compare their removal rates in Cu2+ solution. As shown in the Fig.S1, the removal rate of cellulose is only about 16%, and when cellulose is converted into nanocellulose, the removal rate is doubled. The removal rate of CNF/PVA aerogel has reached 80%, which may be improved due to the increase of specific surface area. Compared with the first three samples, the removal rate of CNF/PVA/PEI nanoparticles was the highest.


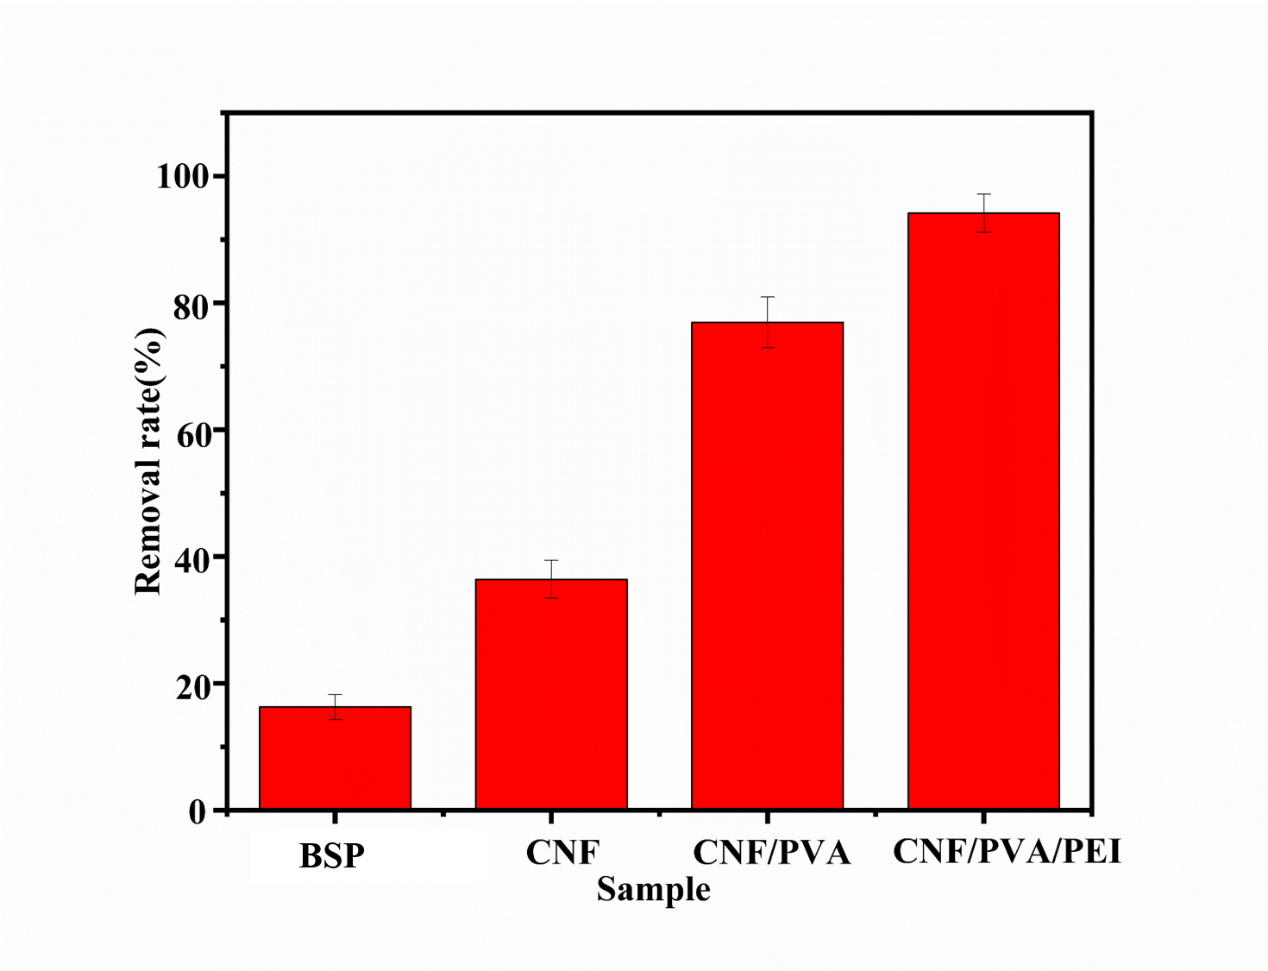


**Figure.S1** Cu2+ removal rate (%) by BSP, CNF aerogel, CNF/PVA/PEI aerogel, CNF/PVA/PEI nanoparticles from deionized water contaminated with 20mg/L of Cu2+
